# Supplementary material for: Novel ZnWO4 yolk–shell microspheres: interface regulation and high removal efficiency for Pb2+
Source: Royal Society of Chemistry journal article supplement (doi:10.1039/d4ce00348a), 2024-01-01
Supplement: d4ce00348a1.pdf [file d4ce00348a1.pdf]

# Novel ZnWO<sub>4</sub> yolk-shell microspheres: interface regulation and high removal efficiency for Pb<sup>2+</sup>

Miao Wang, Kelin Liu, Tongming Sun\* and Yanfeng Tang\*

## S1. Materials

All chemicals were of analytical grade and used without further purification. Na<sub>2</sub>WO<sub>4</sub>·2H<sub>2</sub>O and Ethylene glycol (EG) were all provided by Shanghai Sinopharm Group Chemical Reagent Co., Ltd. Zn(OAc)<sub>2</sub>·2H<sub>2</sub>O, Pb(NO<sub>3</sub>)<sub>2</sub> and L-Asp were purchased from Aladdin Industrial Corporation.

## S2. Characterization

The crystalline phase of the products was analyzed by XRD on a Bruker D8-Advance powder X-ray diffractometer (Cu K $\alpha$  radiation  $\lambda = 0.15418$  nm). The morphology product was observed on scanning electron microscopy (SEM, Zeiss Gemini 300). The specific surface area of powders was examined by using the Brunauer-Emmett-Teller (BET) method on an ASAP 2020 adsorption apparatus. The actual concentration of Pb<sup>2+</sup> in the supernatant after adsorption was determined by atomic absorption spectroscopy (Analytik Jena Nova A350/ZEEnit650p) and inductively coupled plasma analysis (ICP-OES Agilent Technologies Inc, USA). The Zeta potential of the product was measured by Malvern Zetasizer Nano ZS90.

---

*School of Chemistry and Chemical Engineering, Nantong University, Nantong 226019, PRCChina.*

*\*Corresponding author. E-mail: stm7314@ntu.edu.cn; tangyf@ntu.edu.cn.*
